# Supplementary material for: Enhanced Mitochondrial Respiratory Metabolism in UVB-Damaged HDF cells Based on Metabolomics Analysis of Fermented Galla rhois gallnut Extract
Source: Research Square preprint supplement (doi:10.21203/rs.3.rs-8653896/v1), 2026-02-04

Fig.S1 The effect of different concentration of fermented Galla rhois gallnut extract on cellular mitochondrial function. (a) Cellular OCR curve; (b) Basal respiration; (c) ATP production; (d) Maximal respiration; (e) Spare respiration capacity.


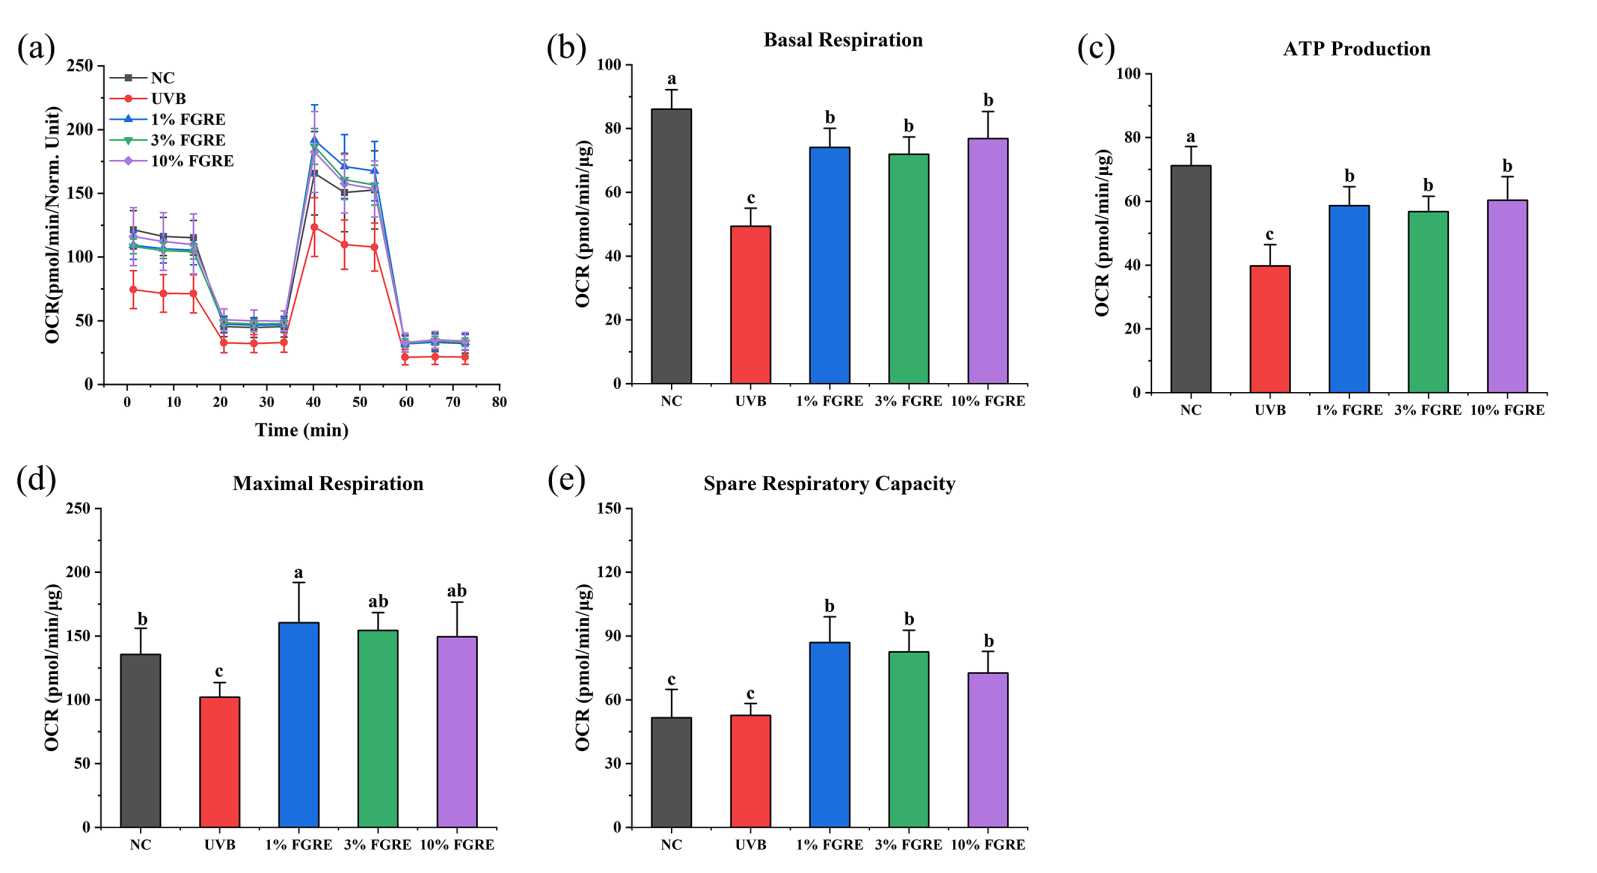


Figure. S2 The effect of different concentration of UroA (a) and UroM5 (b) on ROS inhibition in UVB-induced HaCaT cells.


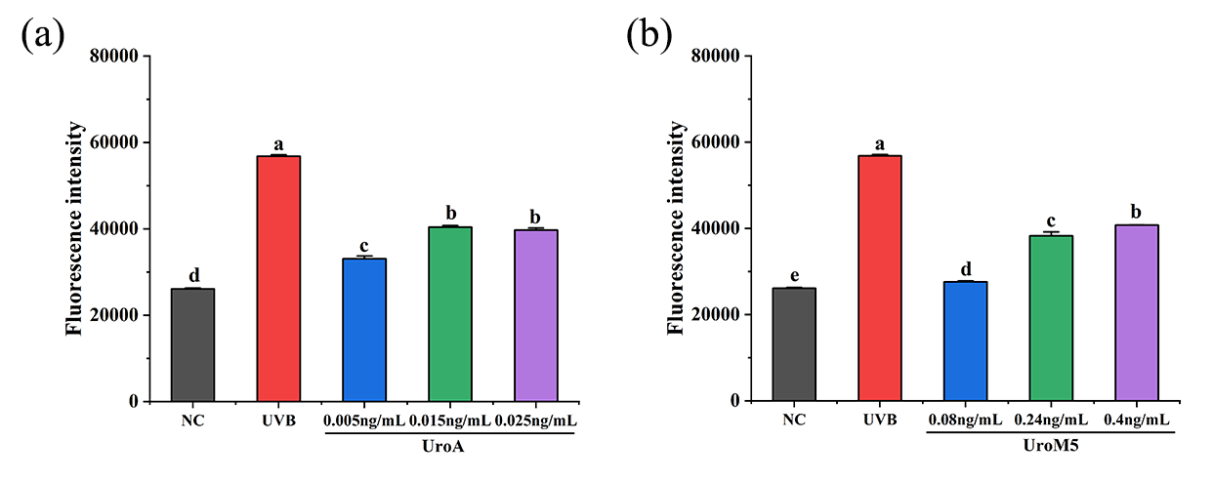

Supplement: Supplementary file 1 [file 9b6e1069d1a254a9a5666670.docx]
